# Supplementary material
Source: PubMed Central journal article supplement (PMC3309713)
Supplement: 1111205109_pnas.201111205SI.pdf [file 1111205109_pnas.201111205SI.pdf]

# Supporting Information

Varadarajan et al. 10.1073/pnas.1111205109

## SI Materials and Methods

**Clinical Groups.** Individuals were grouped according to clinical parameters as follows: HIV controllers [HIV-1 viral load <2,000 RNA copies/mL in the absence of antiretroviral therapy (ART)], chronic untreated (HIV-1 viral load >2,000 RNA copies/mL not receiving ART), and chronic treated (HIV-1 viral load <50 copies/mL receiving ART).

**Fabrication of Nanowell Arrays.** The nanowell arrays were fabricated using a combination of photolithography and replica molding, as described previously (1). Briefly, a silicon wafer supporting a pattern of SU-8 photoresist was prepared by photolithography and used as a template for molding. Nanowell arrays were produced by casting a biocompatible elastomer (polydimethylsiloxane, PDMS; 10:1 base:catalyst; Dow Corning) on this template and curing at 80 °C for 2 h. Each array comprising 72 × 24 blocks of wells was 1 mm thick and adhered directly to a 3 in × 1 in glass slide. In this study, the arrays comprised blocks of 7 × 7 nanowells with dimensions of 50 μm × 50 μm (with a center-to-center distance of 100 μm) for a total of 84,672 wells per array. Before use, the array was sterilized and rendered hydrophilic by treatment with an oxygen plasma (Harrick).

**Preparation of Glass Slides for Microengraving.** Functionalized glass slides were prepared as described (2). Briefly, poly-L-lysine-coated slides were incubated with 10 μg/mL of each capture antibody [IFN-γ (1-D1K; Mabtech), IL-2 (MAB602; R&D), TNF-α (MAB1; Biolegend), and human IgG (81-7100; Invitrogen)] for 1 h at 25 °C and then were stored at 4 °C until use. Borate buffer (pH 9) was used for diluting antibodies (3). Before microengraving, coated slides were blocked with 3% nonfat milk in PBS for 30 min, washed three times with PBS, and spun dry.

**Intracellular Cytokine Staining.** Intracellular staining (ICS) was performed as previously reported (4). Frozen peripheral blood mononuclear cells (PBMCs) were thawed and rested overnight. Then 1 × 10<sup>6</sup> cells in 1 mL of fresh R10 were transferred to 5-mL polycarbonate tubes and incubated with costimulatory antibodies (anti-CD28 and anti-CD49d) just before stimulation with the following conditions: no peptide (negative control), Gag overlapping peptides (OLPs) (0.5 μg/mL), and *Staphylococcus* endotoxin B (SEB) (0.25 μg/mL; positive control). After incubation at 37 °C for 1 h, brefeldin A was added at a concentration of 5 μg/mL, and the cells were transferred to an incubator (37 °C/5%

CO<sub>2</sub>) for 14 h. Cells then were washed with PBS, labeled first with viability dye (Invitrogen) for 30 min and stained for 15 min with the following fluorochrome-conjugated antibodies: CD3-APC H7, CD4-PerCP, CD8-APC, and CD14/19-Pacific Blue (BD Biosciences). The cells then were washed and permeabilized and labeled intracellularly with anti-IL-2-FITC, anti-IFN-γ-PE Cy7, and anti-TNF-α-Alexa 700 (BD Biosciences). Cells then were washed again and analyzed on an LSRII flow cytometer (BD Biosciences).

**ELISpot.** Briefly, frozen PBMCs were thawed and rested overnight, and 10<sup>5</sup> cells in 200 μL of R10 were loaded onto each well of a 96-well plate precoated with anti-human IFN-γ monoclonal antibody (2 μg/mL). Cells then were stimulated with Gag OLPs (14 μg/mL) and incubated overnight. Cells were stimulated separately with phytohemagglutinin (1.25 μg/mL) or no peptide as appropriate positive and negative controls. The plates then were incubated with a biotinylated IFN-γ secondary antibody (30 min) and then with streptavidin-alkaline phosphatase (30 min) and were developed colorimetrically. The frequencies of the responses are reported as the background-corrected spot-forming units per million PBMCs. A response at least two SDs above background was considered a positive response.

ELISpot also was used to map specificities of expanded clonal cells lines. These experiments were carried out as above, except that 5 × 10<sup>4</sup> cells were assessed in each well of a 96-well plate. Individual Gag peptides from the OLP pool (66 individual peptides total) or HLA-matched optimal Gag peptides were used to stimulate the lines. Positive responses were determined to be lines that demonstrated >400 spots per well (in all cases too numerous to count).

**Viral-Inhibition Assay.** Assays were performed as previously described (5). Autologous CD4<sup>+</sup> T cells were negatively enriched from PBMCs using Dynal magnetic bead separation (Invitrogen; 15 μL per 10<sup>6</sup> cells) and activated with anti-CD3.8 antibody (0.5 μg/mL) in R10/50 for 3 d. Activated CD4<sup>+</sup> T cells were infected with HIV-1 strain JRCSF at a multiplicity of infection of 0.05 for 4 h and were washed with R10. Then 1 × 10<sup>5</sup> HIV-exposed cells were plated with bulk CD8 or Gag-specific CD8 clones at a ratio of 1:1 in 200 μL of R10/50. Infected and noninfected CD4 cells were cultured by themselves as positive and negative controls, respectively. HIV replication was assessed by p24 ELISA (Perkin-Elmer) with culture supernatants at day 3, 5, and 7.

1. Ogunnigbi AO, Story CM, Papa E, Guillen E, Love JC (2009) Screening individual hybridomas by microengraving to discover monoclonal antibodies. *Nat Protoc* 4:767–782.
2. Han Q, Bradshaw EM, Nilsson B, Hafler DA, Love JC (2010) Multidimensional analysis of the frequencies and rates of cytokine secretion from single cells by quantitative microengraving. *Lab Chip* 10:1391–1400.
3. Ronan JL, Story CM, Papa E, Love JC (2009) Optimization of the surfaces used to capture antibodies from single hybridomas reduces the time required for microengraving. *J Immunol Methods* 340:164–169.

4. Nomura L, Maino VC, Maecker HT (2008) Standardization and optimization of multiparameter intracellular cytokine staining. *Cytometry A* 73:984–991.
5. Yang OO, et al. (1997) Suppression of human immunodeficiency virus type 1 replication by CD8+ cells: Evidence for HLA class I-restricted triggering of cytolytic and noncytolytic mechanisms. *J Virol* 71:3120–3128.

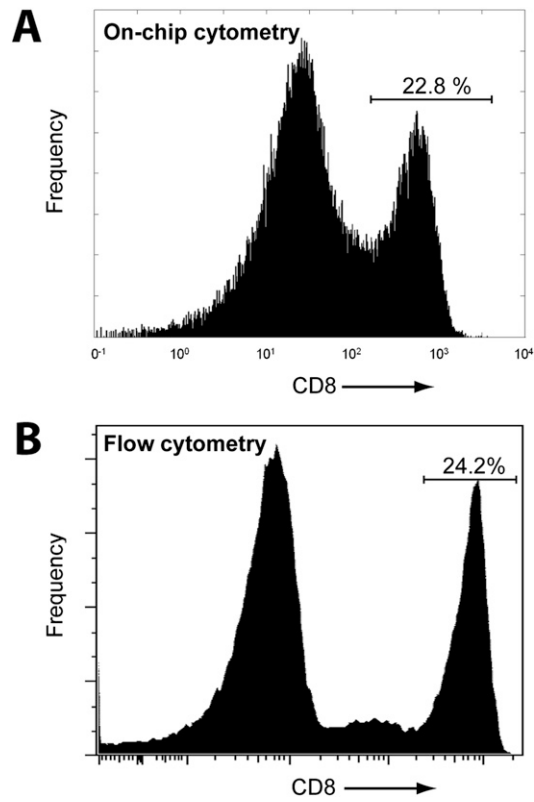

**Fig. S1.** Histograms of the distribution of PBMCs expressing CD8 as determined by on-chip imaging cytometry (A) and comparative analysis by flow cytometry (B).

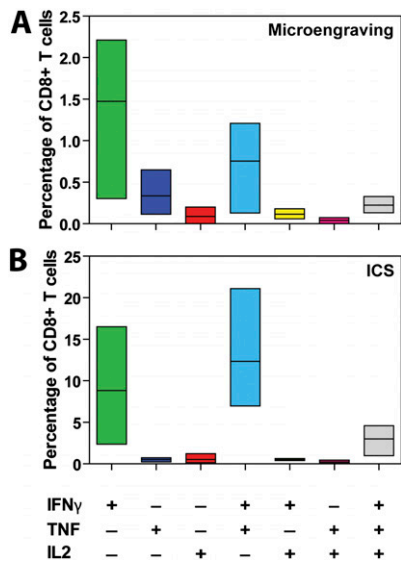

**Fig. S2.** Box plots of the relative distributions of functional responses measured for SEB-activated T cells by microengraving (A) and by ICS (B) (n = 3).

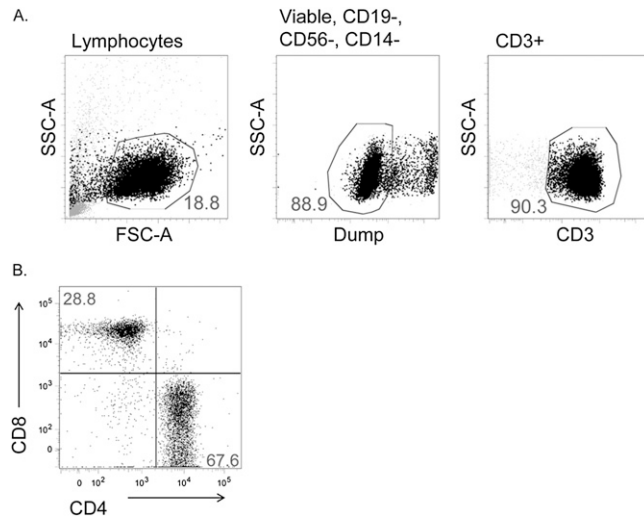

**Fig. S3.** Representative flow cytometry plots of the gating strategy used to identify (A) CD3<sup>+</sup> cells and (B) CD3<sup>+</sup> CD8<sup>+</sup> and CD3<sup>+</sup>CD4<sup>+</sup> cells.

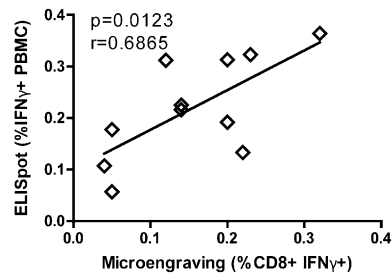

**Fig. S4.** Scatterplots of responses measured from HIV<sup>+</sup> subjects by ELISpot and microengraving. Each diamond indicates one subject. Correlations were assessed by Spearman's rank correlation.

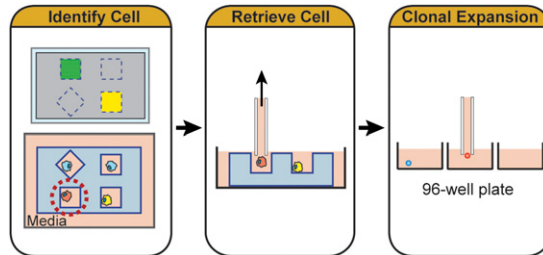

**Fig. S5.** Schematic illustration of the enumeration of IFN- $\gamma$ <sup>+</sup> CD8<sup>+</sup> cells by microengraving and subsequent retrieval by micromanipulation.

**Table S1. Clinical parameters for HIV<sup>+</sup> subjects used for microengraving with CD4<sup>+</sup> and CD8<sup>+</sup> T-cell percentage as determined by flow cytometry**

| Patient ID | Sex    | Age | Race             | Classification | Viral load (copies/mL) | CD4 <sup>+</sup> T-cell count (cells/ $\mu$ L) | CD8% | CD4% |
|------------|--------|-----|------------------|----------------|------------------------|------------------------------------------------|------|------|
| CR0648z    | Male   | 41  | White            | Treated        | <50                    | 649                                            | 58.1 | 36.5 |
| CR0712Y    | Male   | 40  | White            | Treated        | <50                    | 791                                            | 47.2 | 40.7 |
| 013113J    | Male   | 43  | African American | Untreated      | 10,6000                | 230                                            | 68.6 | 22.2 |
| 505402     | Male   | 37  | White            | Untreated      | 39,795                 | 807                                            | 53.2 | 39.8 |
| CR0541v    | Male   | 31  | African American | Untreated      | 4,240                  | 320                                            | 50.1 | 44.9 |
| CR0555w    | Female | 34  | White            | Untreated      | 24,400                 | 875                                            | 53.9 | 40.6 |
| FEN007     | Male   | 45  | African American | Untreated      | 1,420                  | 510                                            | 45.1 | 51.1 |
| 013646a    | Male   | 45  | White            | Controller     | <50                    | 871                                            | 22.0 | 75.3 |
| CR0462R    | Male   | 26  | White            | Controller     | <50                    | 1290                                           | 37.3 | 57.0 |
| CR0509m    | Male   | 45  | African American | Controller     | 3,740                  | 364                                            | 50.5 | 36.3 |
| CR0520z    | Male   | 38  | White            | Controller     | 929                    | 1181                                           | 32.3 | 61.6 |
| CR0559m    | Male   | 47  | White            | Controller     | <50                    | 1026                                           | 40.6 | 55.2 |
| CR0757     | Male   | 44  | White            | Controller     | 10,800                 | 1041                                           | 33.6 | 62.1 |
| CR0772T    | Male   | 40  | African American | Controller     | <50                    | 696                                            | 28.8 | 67.6 |
| CTR0174    | Male   | 46  | African American | Controller     | 110                    | 1024                                           | 43.0 | 49.5 |
| CTR0278c   | Female | 51  | White            | Controller     | 252                    | 271                                            | 63.8 | 28.3 |
| FW23       | Male   | 49  | White            | Controller     | 1,104                  | 829                                            | 30.2 | 63.3 |

**Table S2. Fine epitope specificities of 12 CD8<sup>+</sup> T-cell clones identified from an HIV<sup>+</sup> elite controller by microengraving**

| Clone number | Gag OLP | Optimal peptide | HLA allele | Protein |
|--------------|---------|-----------------|------------|---------|
| CTR0278.1    | 41, 42  | REPWDEWVV       | Cw8        | p24     |
| CTR0278.2    | 59      | FLGKIWPSYK      | A2         | p15     |
| CTR0278.3    | 59      | FLGKIWPSYK      | A2         | p15     |
| CTR0278.4    | 41      | DRFYKTLRA       | B14        | p24     |
| CTR0278.5    | 59      | FLGKIWPSYK      | A2         | p15     |
| CTR0278.6    | 59      | FLGKIWPSYK      | A2         | p15     |
| CTR0278.7    | 11, 12  | SLYNTVATL       | A2         | p17     |
| CTR0278.8    | 41      | DRFYKTLRA       | B14        | p24     |
| CTR0278.9    | 41, 42  | REPWDEWVV       | Cw8        | p24     |
| CTR0278.10   | 11, 12  | SLYNTVATL       | A2         | p17     |
| CTR0278.11   | 25      | TPQDLNTML       | Cw8        | p24     |
| CTR0278.12   | 25      | TPQDLNTML       | Cw8        | p24     |
